# Supplementary material for: Hydrothermal synthesis of N,S co-doped carbon nanodots for highly selective detection of living cancer cells
Source: Royal Society of Chemistry journal article supplement (doi:10.1039/c8tb01271g), 2018-01-01
Supplement: c8tb01271g1.pdf [file c8tb01271g1.pdf]

## Supporting Information

### Hydrothermal synthesis of N,S co-doped carbon nanodots for highly selective detection of living cancer cells

Wenbo Cheng,<sup>†abd</sup> Jun Xu,<sup>†c</sup> Zhenzhen Guo,<sup>b</sup> Dawei Yang,<sup>b</sup> Xifeng Chen,<sup>be</sup> Wei Yan,<sup>\*a</sup>  
and Peng Miao<sup>\*b</sup>

<sup>a</sup> State Key Lab of Optical Technologies on Nano-fabrication and Micro-engineering, Institute of Optics and Electronics, Chinese Academy of Sciences, Chengdu 610209, P. R. China

<sup>b</sup> Suzhou Institute of Biomedical Engineering and Technology, Chinese Academy of Sciences, Suzhou 215163, P. R. China

<sup>c</sup> Suzhou Blood Center, Suzhou, 215006, P. R. China

<sup>d</sup> University of Chinese Academy of Sciences, Beijing 100049, P. R. China

<sup>e</sup> Tianjin Guoke Jiaye Medical Technology Development Co., LTD, Tianjin, 300399, P. R. China

E-mail: miaopeng@sibet.ac.cn (P. Miao); yanwei@ioe.ac.cn (W. Yan); Fax: +86-512-69588283

<sup>†</sup> The authors contributed equally.

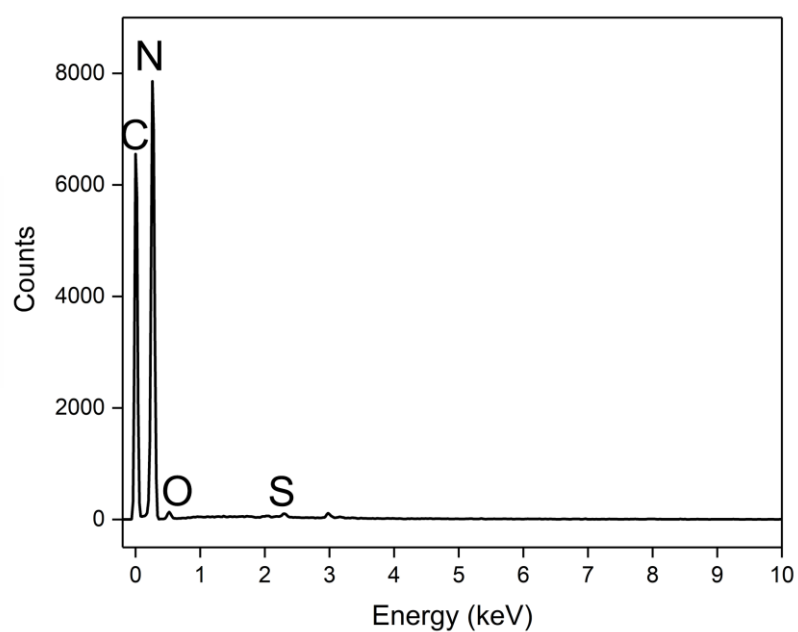

**Fig. S1** EDX spectrum of the prepared carbon nanodots.

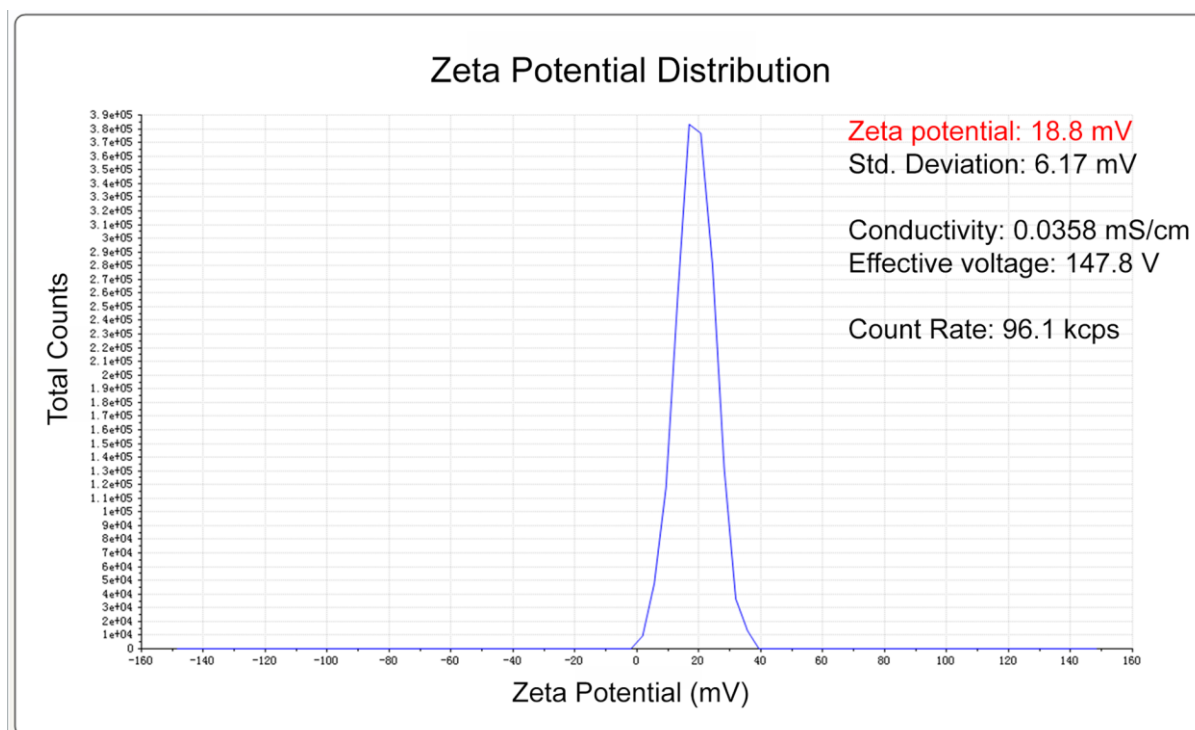

**Fig. S2** Zeta potential distribution of the carbon nanodots.

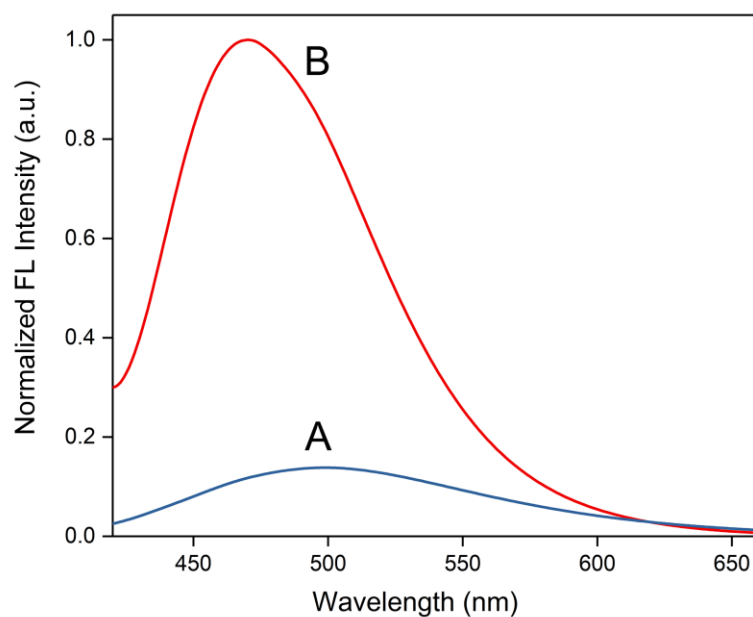

**Fig. S3** Comparison of fluorescence emission spectra of carbon nanodots synthesized (A) without and (B) thiourea.

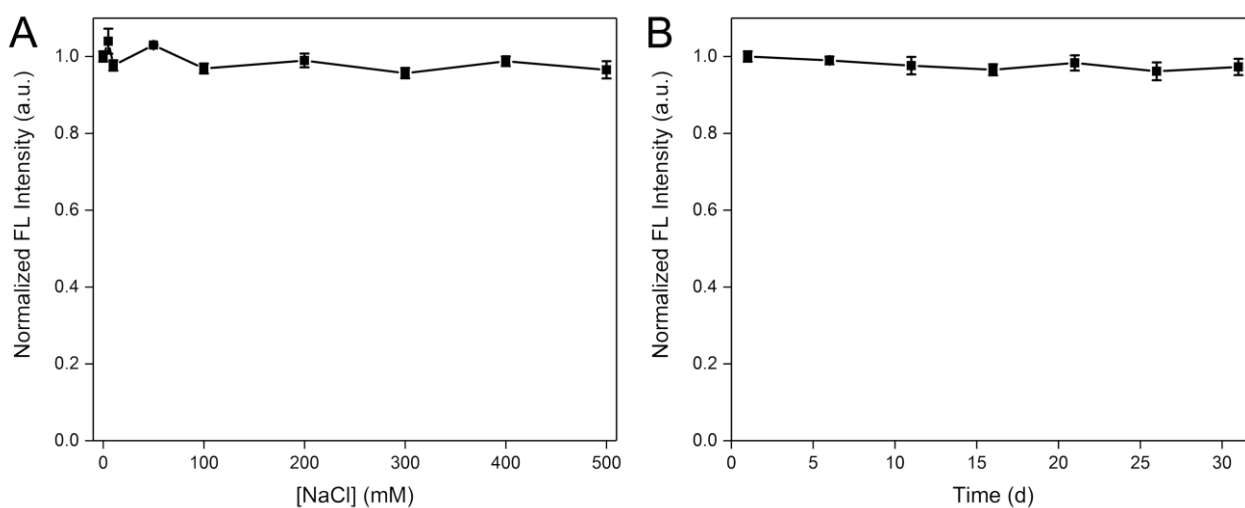

**Fig. S4** (A) Effect of ionic strength on the fluorescence of the carbon nanodots. (B) Fluorescence peak intensities of the carbon nanodots during 31 days.

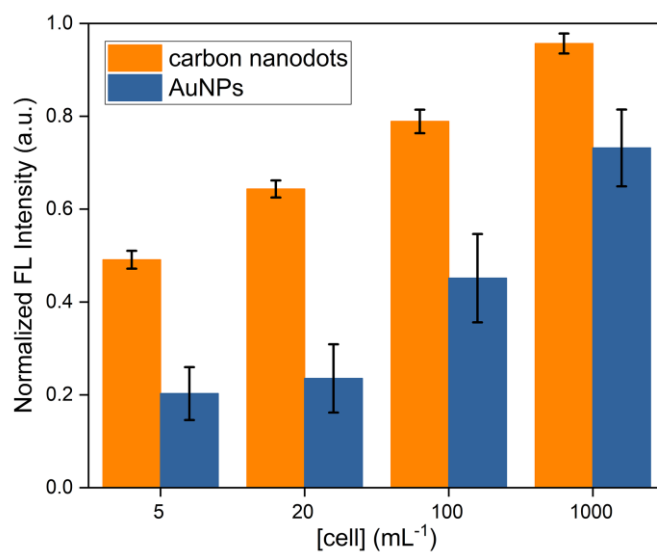

**Fig. S5** Fluorescence peak intensities of carbon nanodots-BHQ and AuNPs-FAM based fluorescent systems for the detection of different amount of cells.

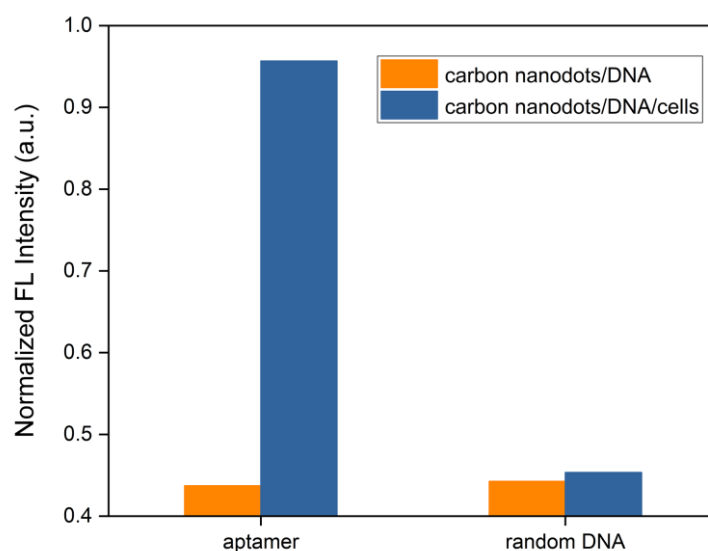

**Fig. S6** Fluorescence peak intensities of the aptamer and random DNA wrapped carbon nanodots before and after the interactions with target cells.
